# Supplementary material
Source: PubMed Central journal article supplement (PMC3122918)
Supplement: supp_M012666_jlr.M012666-1.pdf [file supp_M012666_jlr.M012666-1.pdf]

Supplementary Figure 1

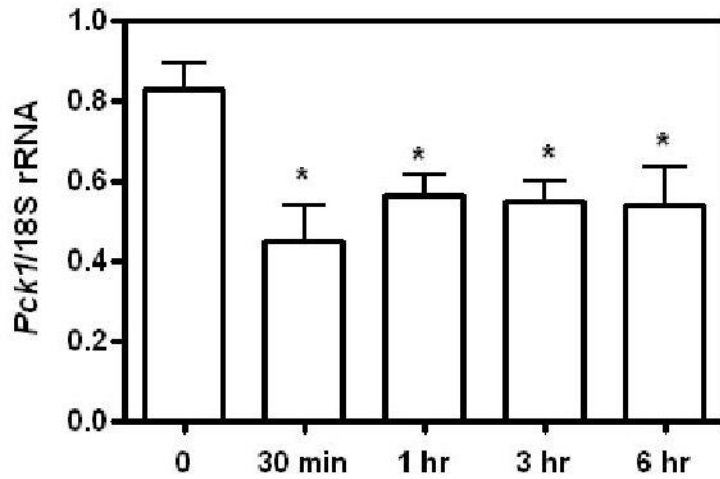

**Supplementary Figure 1. HC11 cells after prolactin treatment.** HC11 cells were treated without (-) and with prolactin (1 $\mu$ g/ml) for 0-6hr as indicated. Expression of *Pck1* mRNA was measured by RT-PCR. Values are the mean $\pm$  SEM, n=6, \* $P$ <0.05.
