# Supplementary material
Source: PubMed Central journal article supplement (PMC3122918)
Supplement: supp_M012666_jlr.M012666-2.pdf [file supp_M012666_jlr.M012666-2.pdf]

Supplementary Figure 2

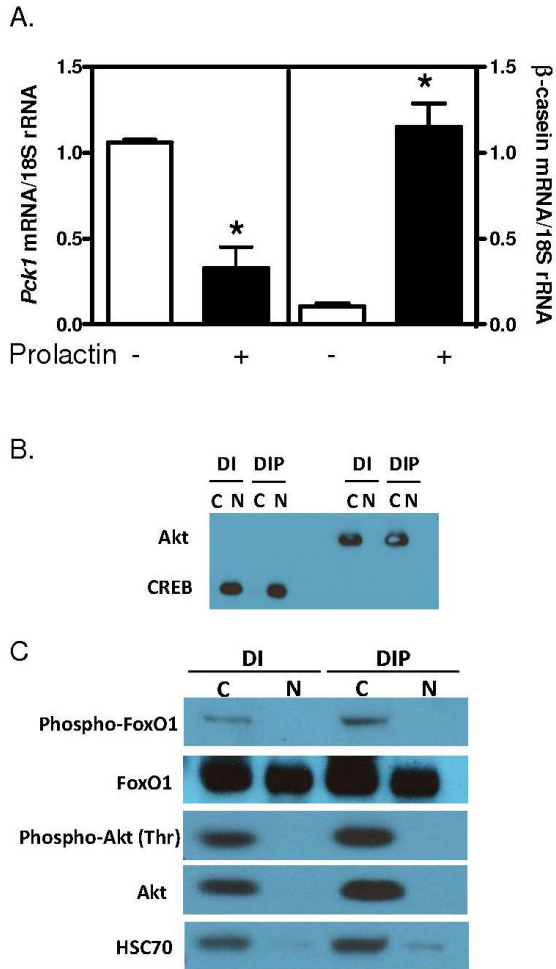

**Supplementary Figure 2. HC11 cells after prolactin treatment.** HC11 cells were treated without (-) and with (+) prolactin (1 $\mu$ g/ml) for 72 h. Expression of A) *Pck1* and  $\beta$ -casein mRNA were measured by RT-PCR. Values are the mean $\pm$  SEM, n=6, \* $P$ <0.05. Protein was isolated from HC11 cells treated with lactogenic hormones dexamethasone, insulin and prolactin (DIP) or lactogenic hormones minus prolactin (dexamethasone and insulin, DI). Western Blot analysis of cell fractions B) with AKT and CREB antibodies or C) with antibodies for phosphorylated FoxO1, total FoxO1, phosphorylated AKT, total AKT and controlled for loading differences by heat shock cognate 70 (HSC70) antibody. Blot is representative of experiment, n=5.
