# Supplementary material
Source: PubMed Central journal article supplement (PMC3122918)
Supplement: supp_M012666_jlr.M012666-3.pdf [file supp_M012666_jlr.M012666-3.pdf]

Supplementary table 1. Primers used for quantitative real-time PCR

| Gene          | Forward Primer             | Reverse Primer            |
|---------------|----------------------------|---------------------------|
| Pck1          | 5'-GTGCTGGAGTGGATGTTCGG    | 5'-CTGGCTGATTCTCTGTTTCAGG |
| Gyk           | 5'-CCGAAGGAAATTCTGCAGTC    | 5'-CTCTCCGGTGACCTTGTC     |
| PPAR $\gamma$ | 5'-GTGCCAGTTTCGATCCGTAGA   | 5'-GGCCAGCATCGTGTAGATGA   |
| FoxO1         | 5'-TTCAATTCGCCACAATCTGTCC  | 5'-GGGTGATTTTCCGCTCTTGC   |
| Pcx           | 5'-CTGAAGTTCCAAACAGTTCGAGG | 5'-CGCACGAAACACTCGGATG    |
| G6p           | 5'-CGACTCGCTATCTCCAAGTGA   | 5'-GTTGAACCAGTCTCCGACCA   |
| Fbp           | 5'-AGTCGTCCTACGCTACCTGTG   | 5'-AGGGGATCGAAACAGACAACA  |
| 18S rRNA      | 5'-AGAAACGGCTACCACATCCAAG  | 5'-GACTCATTCCAATTACAGGGCC |
